# Supplementary material
Source: PubMed Central journal article supplement (PMC8978300)
Supplement: kxy058_supplementary_materials.pdf [file kxy058_supplementary_materials.pdf]

# Supplementary Material for “Array testing with multiplex assays”

PEIJIE HOU

*Takeda Pharmaceutical Inc., 300 Massachusetts Avenue, Cambridge, MA 02139, USA*

JOSHUA M. TEBBS\*, DEWEI WANG

*Department of Statistics, University of South Carolina, Columbia, SC 29208, USA*

\*tebbs@stat.sc.edu

CHRISTOPHER S. MCMAHAN

*Department of Mathematical Sciences, Clemson University, Clemson, SC 29634, USA*

CHRISTOPHER R. BILDER

*Department of Statistics, University of Nebraska-Lincoln, Lincoln, NE 68583, USA*

**Appendix A.** *Derivation of EFF(AT) for  $K = 2$  diseases.* As noted in Section 3.1 in the manuscript,

$$\text{EFF(AT)} = \frac{1}{n^2} \left\{ 2n + n^2 \text{pr}(T_{ij1}^{(\text{AT})} + T_{ij2}^{(\text{AT})} \geq 1) \right\},$$

where  $\text{pr}(T_{ij1}^{(\text{AT})} + T_{ij2}^{(\text{AT})} \geq 1) = \text{pr}(T_{ij1}^{(\text{AT})} = 1) + \text{pr}(T_{ij2}^{(\text{AT})} = 1) - \text{pr}(T_{ij1}^{(\text{AT})} = 1, T_{ij2}^{(\text{AT})} = 1)$ . Calculating the marginal probabilities  $\text{pr}(T_{ij1}^{(\text{AT})} = 1)$  and  $\text{pr}(T_{ij2}^{(\text{AT})} = 1)$  follows from Kim et al. (2007) as described in Section 3.1. The hard part is calculating the joint probability

$$\begin{aligned} \text{pr}(T_{ij1}^{(\text{AT})} = 1, T_{ij2}^{(\text{AT})} = 1) &= \text{pr}(\mathbf{R}'_i = (1, 1), \mathbf{C}'_j = (1, 1)) \\ &+ 2 \sum_{k=1}^2 \text{pr} \left( \mathbf{R}'_i = (1, 1), C_{jk} = 1, \sum_{j'=1}^n C_{j'k} = 0 \right) \\ &+ 2 \text{pr} \left( \mathbf{R}'_i = (1, 1), \sum_{j'=1}^n C_{j'1} = 0, \sum_{j'=1}^n C_{j'2} = 0 \right) \\ &+ 2 \text{pr} \left( R_{i1} = 1, \sum_{j'=1}^n C_{j'1} = 0, C_{j2} = 1, \sum_{i'=1}^n R_{i'2} = 0 \right). \end{aligned} \quad (\text{A.1})$$

We derive closed-form expressions for each probability on the RHS of Equation (A.1). Recall Assumption 3 in the manuscript which defines  $S_{e:k}^{(n)}$  and  $S_{p:k}^{(n)}$  as the multiplex assay sensitivity and specificity for testing row and column master pools of size  $n$ , respectively, for the  $k$ th disease ( $k = 1, 2$ ). The following five definitions are needed.

**DEFINITION 1:** Let  $f_k(s)$  denote the probability a pool of size  $s \leq n$  is diagnosed positively for the  $k$ th disease,  $k = 1, 2$ . Then

$$f_k(s) = S_{e:k}^{(n)} + \bar{\pi}_k^s (1 - S_{e:k}^{(n)} - S_{p:k}^{(n)}),$$

where  $\bar{\pi}_k = 1 - \pi_k$  and  $\pi_k$  is the marginal probability of the  $k$ th disease; i.e.,  $\pi_1 = p_{10} + p_{11}$  and  $\pi_2 = p_{01} + p_{11}$ .

**DEFINITION 2:** Let  $f^b(s)$  denote the probability a pool of size  $s \leq n$  is diagnosed positively for both diseases. Then

$$f^b(s) = \eta_0^{(s)} \overline{S}_{p:1}^{(n)} \overline{S}_{p:2}^{(n)} + \eta_1^{(s)} S_{e:1}^{(n)} \overline{S}_{p:2}^{(n)} + \eta_2^{(s)} \overline{S}_{p:1}^{(n)} S_{e:2}^{(n)} + \eta_3^{(s)} S_{e:1}^{(n)} S_{e:2}^{(n)},$$

where  $\overline{S}_{e:k}^{(n)} = 1 - S_{e:k}^{(n)}$  and  $\overline{S}_{p:k}^{(n)} = 1 - S_{p:k}^{(n)}$  ( $k = 1, 2$ ), and  $\eta_0^{(s)} = p_{00}^s$ ,  $\eta_1^{(s)} = (p_{00} + p_{10})^s - p_{00}^s$ , and  $\eta_2^{(s)} = (p_{00} + p_{01})^s - p_{00}^s$ . The latter three quantities are the true pool status probabilities corresponding to “00,” “10,” and “01,” respectively. The quantity  $\eta_3^{(s)} = 1 - \eta_0^{(s)} - \eta_1^{(s)} - \eta_2^{(s)}$  is the probability a pool of size  $s$  is “11;” i.e., truly positive for both diseases.

**Note:** The expressions for  $\eta_0^{(\cdot)}$ ,  $\eta_1^{(\cdot)}$ ,  $\eta_2^{(\cdot)}$ , and  $\eta_3^{(\cdot)}$  in Definition 2 are used in subsequent definitions and calculations.

**DEFINITION 3:** For an array with  $s_1 \leq n$  columns and  $s_2 \leq n$  rows, let  $g_k(c; s_1, s_2)$  denote the probability that  $c$  columns ( $c = 0, 1, \dots, s_1$ ) are truly positive for  $k$ th disease,  $k = 1, 2$ . Then

$$\begin{aligned} g_1(c; s_1, s_2) &= \binom{s_1}{c} (\eta_2^{(s_2)} + \eta_3^{(s_2)})^c (1 - \eta_2^{(s_2)} - \eta_3^{(s_2)})^{s_1 - c} \\ g_2(c; s_1, s_2) &= \binom{s_1}{c} (\eta_1^{(s_2)} + \eta_3^{(s_2)})^c (1 - \eta_1^{(s_2)} - \eta_3^{(s_2)})^{s_1 - c}. \end{aligned}$$

**DEFINITION 4:** For an array with  $s \leq n$  columns and  $n$  rows, the probability  $c_1$  columns are truly positive for the first disease and  $c_2$  columns are truly positive for the second disease is

$$g_{c_1, c_2}(s; \boldsymbol{\eta}) = \sum_{w=0}^{\min(c_1, c_2)} \binom{s}{w} \binom{s-w}{c_1-w} \binom{s-c_1}{c_2-w} (\eta_0^{(n)})^{s-c_1-c_2+w} (\eta_1^{(n)})^{c_1-w} (\eta_2^{(n)})^{c_2-w} (\eta_3^{(n)})^w,$$

where  $\boldsymbol{\eta} = (\eta_0^{(n)}, \eta_1^{(n)}, \eta_2^{(n)}, \eta_3^{(n)})'$ , for  $c_1, c_2 = 0, 1, \dots, s$ .

**DEFINITION 5:** For an array with  $s_1 \leq n$  columns and  $s_2 \leq n$  rows, the probability  $c_1$  columns are truly positive for the first disease and  $r_2$  rows are truly positive for the second disease is

$$\begin{aligned} B(s_1, c_1; s_2, r_2) &= \binom{s_1}{c_1} \binom{s_2}{r_2} \overline{\pi}_2^{(s_2-r_2)c_1} \overline{\pi}_1^{(s_1-c_1)r_2} \{1 - B_1(s_1, c_1; s_2, r_2) - B_2(s_1, c_1; s_2, r_2) \\ &\quad + B_3(s_1, c_1; s_2, r_2)\} p_{00}^{(s_1-c_1)(s_2-r_2)}, \end{aligned}$$

where

$$\begin{aligned} B_1(s_1, c_1; s_2, r_2) &= 1 - \{1 - \overline{\pi}_1^{r_2} (p_{00}/\overline{\pi}_2)^{s_2-r_2}\}^{c_1} \\ B_2(s_1, c_1; s_2, r_2) &= 1 - \{1 - \overline{\pi}_2^{c_2} (p_{00}/\overline{\pi}_1)^{s_1-c_1}\}^{r_2} \end{aligned}$$

and

$$B_3(s_1, c_1; s_2, r_2) = \sum_{l=1}^{c_1} \sum_{m=1}^{r_2} (-1)^{m+l} \binom{c_1}{l} \binom{r_2}{m} p_{00}^{lm} \overline{\pi}_1^{(r_2-m)l} \overline{\pi}_2^{(c_1-l)m} \left(\frac{p_{00}}{\overline{\pi}_2}\right)^{l(s_2-r_2)} \left(\frac{p_{00}}{\overline{\pi}_1}\right)^{m(s_1-c_1)}.$$

With these 5 definitions, we now provide closed-form expressions for each probability on the RHS of Equation (A.1).

The first probability  $\text{pr}(\mathbf{R}'_i = (1, 1), \mathbf{C}'_j = (1, 1))$  equals

$$\begin{aligned} & \sum_{\tilde{y}_1=0}^1 \sum_{\tilde{y}_2=0}^1 \text{pr}(\mathbf{R}'_i = (1, 1), \mathbf{C}'_j = (1, 1) | \tilde{\mathbf{Y}}'_{ij} = (\tilde{y}_1, \tilde{y}_2)) \text{pr}(\tilde{\mathbf{Y}}'_{ij} = (\tilde{y}_1, \tilde{y}_2)) \\ & = p_{00} \{f^b(n-1)\}^2 + p_{10} (S_{e:1}^{(n)})^2 \{f_2(n-1)\}^2 + p_{01} (S_{e:2}^{(n)})^2 \{f_1(n-1)\}^2 + p_{11} (S_{e:1}^{(n)})^2 (S_{e:2}^{(n)})^2, \end{aligned}$$

where  $f_1(\cdot)$  and  $f_2(\cdot)$  are given in Definition 1 and  $f^b(\cdot)$  is given in Definition 2.

The second probability  $\text{pr}(\mathbf{R}'_i = (1, 1), C_{jk} = 1, \sum_{j'=1}^n C_{j'k'} = 0)$  can be written as

$$\begin{aligned} & \sum_{r_k=0}^1 \sum_{c_k=0}^1 \sum_{r_{k'}=0}^1 \sum_{c_{k'}=r_{k'}}^n \text{pr} \left( \tilde{R}_{ik} = r_k, \tilde{C}_{jk} = c_k, \tilde{R}_{ik'} = r_{k'}, \sum_{j'=1}^n \tilde{C}_{j'k'} = c_{k'} \right) \\ & \times \text{pr} \left( \mathbf{R}'_i = (1, 1), C_{jk} = 1, \sum_{j'=1}^n C_{j'k'} = 0 \middle| \tilde{R}_{ik} = r_k, \tilde{C}_{jk} = c_k, \tilde{R}_{ik'} = r_{k'}, \sum_{j'=1}^n \tilde{C}_{j'k'} = c_{k'} \right) \end{aligned}$$

which equals

$$\begin{aligned} & \sum_{r_k=0}^1 \sum_{c_k=0}^1 \sum_{r_{k'}=0}^1 \sum_{c_{k'}=r_{k'}}^n \text{pr} \left( \tilde{R}_{ik} = r_k, \tilde{C}_{jk} = c_k, \tilde{R}_{ik'} = r_{k'}, \sum_{j'=1}^n \tilde{C}_{j'k'} = c_{k'} \right) \\ & \times (S_{e:k}^{(n)})^{r_k+c_k} (\bar{S}_{p:k}^{(n)})^{2-r_k-c_k} (S_{e:k'}^{(n)})^{r_{k'}} (\bar{S}_{p:k'}^{(n)})^{1-r_{k'}} (\bar{S}_{e:k'}^{(n)})^{c_{k'}} (S_{p:k'}^{(n)})^{n-c_{k'}}. \end{aligned}$$

Define

$$h_{r_k c_k r_{k'}}^{(1)}(n; k, c_{k'}) = \text{pr} \left( \tilde{R}_{ik} = r_k, \tilde{C}_{jk} = c_k, \tilde{R}_{ik'} = r_{k'}, \sum_{j'=1}^n \tilde{C}_{j'k'} = c_{k'} \right),$$

for  $r_k, c_k, r_{k'} \in \{0, 1\}$ ,  $c_{k'} \in \{r_{k'}, r_{k'} + 1, \dots, n\}$ , and  $k = 1, 2$ . By the Law of Total Probability, it follows that, for example,

$$\begin{aligned} h_{000}^{(1)}(n; k, c_{k'}) &= \sum_{c=0}^1 \text{pr} \left( \tilde{R}_{ik} = 0, \tilde{C}_{jk} = 0, \tilde{R}_{ik'} = 0, \tilde{C}_{j'k'} = c, \sum_{j' \neq j} \tilde{C}_{j'k'} = c_{k'} - c \right) \\ &= \eta_0^{(n)} \sum_{c=0}^1 \eta_{ck'}^{(n-1)} g_{k'}(c_{k'} - c; n-1, n-1), \end{aligned}$$

where the  $g_{k'}(\cdot)$  functions are given in Definition 3. The other 7 values of  $h_{r_k c_k r_{k'}}^{(1)}(n; k, c_{k'})$ , derived similarly, are presented below. The first two are

$$h_{001}^{(1)}(n; k, c_{k'}) = \sum_{c=0}^1 \eta_{ck'}^{(n)} \sum_{w=0}^{c_{k'}-c} \binom{n-1}{w} (\eta_{k'}^{(1)})^w p_{00}^{n-w-1} g_{k'}(c_{k'} - w - c; n-1, n-w-1) - h_{000}^{(1)}(n; k, c_{k'})$$

$$h_{010}^{(1)}(n; k, c_{k'}) = \eta_0^{(n)} \sum_{c=0}^1 \eta_{(c-1)k'+3}^{(n-1)} g_{k'}(c_{k'} - c; n-1, n-1).$$

The last five are

$$\begin{aligned}
h_{100}^{(1)}(n; k, c_{k'}) &= \eta_k^{(n-1)} \sum_{c=0}^1 p_{00}^c \eta_{c_{k'}}^{(n-c)} g_{k'}(c_{k'} - c; n-1, n-1) \\
h_{011}^{(1)}(n; k, c_{k'}) &= \sum_{w=0}^{c_{k'}} \binom{n}{w} (\eta_{k'}^{(1)})^w p_{00}^{n-w} g_{k'}(c_{k'} - w; n-1, n-w) - h_{000}^{(1)}(n; k, c_{k'}) - h_{001}^{(1)}(n; k, c_{k'}) \\
&\quad - h_{010}^{(1)}(n; k, c_{k'}) \\
h_{101}^{(1)}(n; k, c_{k'}) &= \sum_{c=0}^1 \eta_{c_{k'}}^{(n)} g_{k'}(c_{k'} - c; n, n-1) - h_{000}^{(1)}(n; k, c_{k'}) - h_{001}^{(1)}(n; k, c_{k'}) - h_{100}^{(1)}(n; k, c_{k'}) \\
h_{110}^{(1)}(n; k, c_{k'}) &= (\eta_0^{(n)} + \eta_k^{(n)}) g_{k'}(c_{k'}; n-1, n) - h_{000}^{(1)}(n; k, c_{k'}) - h_{010}^{(1)}(n; k, c_{k'}) - h_{100}^{(1)}(n; k, c_{k'}) \\
h_{111}^{(1)}(n; k, c_{k'}) &= g_{k'}(c_{k'}; n, n) - \sum_{\substack{r_k=0 \\ r_k+c_k+r_{k'}<3}}^1 \sum_{c_k=0}^1 \sum_{r_{k'}=0}^1 h_{r_k c_k r_{k'}}^{(1)}(n; k, c_{k'}).
\end{aligned}$$

The third probability  $\text{pr}(\mathbf{R}'_i = (1, 1), \sum_{j'=1}^n C_{j'1} = 0, \sum_{j'=1}^n C_{j'2} = 0)$  can be written as

$$\begin{aligned}
&\sum_{r_1=0}^1 \sum_{r_2=0}^1 \sum_{c_1=r_1}^n \sum_{c_2=r_2}^n \text{pr} \left( \tilde{\mathbf{R}}'_i = (r_1, r_2), \sum_{j'=1}^n \tilde{C}_{j'1} = c_1, \sum_{j'=1}^n \tilde{C}_{j'2} = c_2 \right) \\
&\quad \times (S_{e:1}^{(n)})^{r_1} (\bar{S}_{p:1}^{(n)})^{1-r_1} (S_{e:2}^{(n)})^{r_2} (\bar{S}_{p:2}^{(n)})^{1-r_2} (\bar{S}_{e:1}^{(n)})^{c_1} (S_{p:1}^{(n)})^{n-c_1} (\bar{S}_{e:2}^{(n)})^{c_2} (S_{p:2}^{(n)})^{n-c_2}.
\end{aligned}$$

Define

$$h_{r_1 r_2}^{(2)}(n; c_1, c_2) = \text{pr} \left( \tilde{\mathbf{R}}'_i = (r_1, r_2), \sum_{j'=1}^n \tilde{C}_{j'1} = c_1, \sum_{j'=1}^n \tilde{C}_{j'2} = c_2 \right),$$

for  $r_1, r_2 \in \{0, 1\}$ ,  $c_1 \in \{r_1, r_1 + 1, \dots, n\}$ , and  $c_2 \in \{r_2, r_2 + 1, \dots, n\}$ . Using the function in Definition 4, we have

$$\begin{aligned}
h_{00}^{(2)}(n; c_1, c_2) &= g_{c_1, c_2}(n; \eta_0^{(n)}, p_{00} \eta_1^{(n-1)}, p_{00} \eta_2^{(n-1)}, p_{00} \eta_3^{(n-1)}) \\
h_{01}^{(2)}(n; c_1, c_2) &= g_{c_1, c_2}(n; \eta_0^{(n)}, p_{00} \eta_1^{(n-1)}, \eta_2^{(n)}, p_{00} \eta_3^{(n-1)} + p_{01}(\eta_1^{(n-1)} + \eta_3^{(n-1)})) - h_{00}^{(2)}(n; c_1, c_2) \\
h_{10}^{(2)}(n; c_1, c_2) &= g_{c_1, c_2}(n; \eta_0^{(n)}, \eta_1^{(n)}, p_{00} \eta_2^{(n-1)}, p_{00} \eta_3^{(n-1)} + p_{10}(\eta_2^{(n-1)} + \eta_3^{(n-1)})) - h_{00}^{(2)}(n; c_1, c_2) \\
h_{11}^{(2)}(n; c_1, c_2) &= g_{c_1, c_2}(n; \eta_0^{(n)}, \eta_1^{(n)}, \eta_2^{(n)}, \eta_3^{(n)}) - \sum_{\substack{r_1=0 \\ r_1+r_2<2}}^1 \sum_{r_2=0}^1 h_{r_1 r_2}^{(2)}(n; c_1, c_2).
\end{aligned}$$

The fourth probability  $\text{pr}(R_{i1} = 1, \sum_{j'=1}^n C_{j'1} = 0, C_{j2} = 1, \sum_{i'=1}^n R_{i'2} = 0)$  can be written as

$$\begin{aligned}
&\sum_{r_1=0}^1 \sum_{c_1=r_1}^n \sum_{c_2=0}^1 \sum_{r_2=c_2}^n \text{pr} \left( \tilde{R}_{i1} = r_1, \sum_{j'=1}^n \tilde{C}_{j'1} = c_1, \tilde{C}_{j2} = c_2, \sum_{i'=1}^n \tilde{R}_{i'2} = r_2 \right) \\
&\quad \times (S_{e:1}^{(n)})^{r_1} (\bar{S}_{p:1}^{(n)})^{1-r_1} (\bar{S}_{e:1}^{(n)})^{c_1} (S_{p:1}^{(n)})^{n-c_1} (S_{e:2}^{(n)})^{c_2} (\bar{S}_{p:2}^{(n)})^{1-c_2} (\bar{S}_{e:2}^{(n)})^{r_2} (S_{p:2}^{(n)})^{n-r_2}.
\end{aligned}$$

Define

$$h_{r_1 c_2}^{(3)}(n; c_1, r_2) = \text{pr} \left( \tilde{R}_{i1} = r_1, \sum_{j'=1}^n \tilde{C}_{j'1} = c_1, \tilde{C}_{j2} = c_2, \sum_{i'=1}^n \tilde{R}_{i'2} = r_2 \right),$$

for  $r_1, c_2 \in \{0, 1\}$ ,  $c_1 \in \{r_1, r_1 + 1, \dots, n\}$ , and  $r_2 \in \{r_2, r_2 + 1, \dots, n\}$ . Using the function in Definition 5, we have

$$\begin{aligned}
h_{00}^{(3)}(n; c_1, r_2) &= \eta_0^{(2n-1)} B(n-1, c_1; n-1, r_2) + \eta_0^{(n)} \eta_1^{(n-1)} B(n-1, c_1-1; n-1, r_2) \\
&\quad + \eta_0^{(n)} \eta_2^{(n-1)} B(n-1, c_1; n-1, r_2-1) \\
&\quad + p_{00} \eta_1^{(n-1)} \eta_2^{(n-1)} B(n-1, c_1-1; n-1, r_2-1) \\
h_{01}^{(3)}(n; c_1, r_2) &= \eta_0^{(n)} B(n, c_1; n-1, r_2) + \eta_2^{(n)} B(n, c_1; n-1, r_2-1) - h_{00}^{(3)}(n; c_1, r_2) \\
h_{10}^{(3)}(n; c_1, r_2) &= \eta_0^{(n)} B(n-1, c_1; n, r_2) + \eta_1^{(n)} B(n-1, c_1-1; n, r_2) - h_{00}^{(3)}(n; c_1, r_2) \\
h_{11}^{(3)}(n; c_1, r_2) &= B(n, c_1; n, r_2) - h_{00}^{(3)}(n; c_1, r_2) - h_{10}^{(3)}(n; c_1, r_2) - h_{01}^{(3)}(n; c_1, r_2).
\end{aligned}$$

Each probability on the RHS of Equation (A.1) has been derived in closed form, thereby completing the derivation of EFF(AT) for  $K = 2$  diseases.

**Remark:** Deriving EFF(AT) in closed form for  $K > 2$  diseases would follow the same arguments as those presented herein for the  $K = 2$  case; however, they would be far more tedious in the presence of potential testing error.

**Appendix B.** *Pooling sensitivity/specificity derivations for AT and  $K = 2$  diseases.* We now derive closed-form expressions for  $\text{PS}_{e:k}$  and  $\text{PS}_{p:k}$  as defined in Section 3.2 in the manuscript. Recall Assumption 3 in the manuscript which defines  $S_{e:k}^{(n)}$  and  $S_{p:k}^{(n)}$  as the multiplex assay sensitivity and specificity for testing row and column master pools of size  $n$ , respectively, for the  $k$ th disease ( $k = 1, 2$ ). Also in the manuscript, we let  $S_{e:k}^{(1)}$  and  $S_{p:k}^{(1)}$  denote the same multiplex assay accuracy probabilities for individual testing.

Recall that  $\text{PS}_{e:k}$  is the probability an individual is classified as positive for the  $k$ th infection ( $k = 1, 2$ ) given that the individual is truly positive for the  $k$ th infection; i.e.,

$$\text{PS}_{e:k} = \text{pr}(Y_{ijk} = 1, T_{ij1}^{(\text{AT})} + T_{ij2}^{(\text{AT})} \geq 1 | \tilde{Y}_{ijk} = 1).$$

Using inclusion-exclusion for conditional probabilities, we can write  $\text{PS}_{e:k}$  as

$$\begin{aligned}
\text{pr}(Y_{ijk} = 1, T_{ijk}^{(\text{AT})} = 1 | \tilde{Y}_{ijk} = 1) &= \text{pr}(Y_{ijk} = 1, T_{ijk'}^{(\text{AT})} = 1 | \tilde{Y}_{ijk} = 1) \\
&\quad - \text{pr}(Y_{ijk} = 1, T_{ijk}^{(\text{AT})} = 1, T_{ijk'}^{(\text{AT})} = 1 | \tilde{Y}_{ijk} = 1). \quad (\text{B.1})
\end{aligned}$$

We now derive expressions for each probability on the RHS of Equation (B.1). The first probability

$$\begin{aligned}
\text{pr}(Y_{ijk} = 1, T_{ijk}^{(\text{AT})} = 1 | \tilde{Y}_{ijk} = 1) &= \text{pr}(Y_{ijk} = 1, R_{ik} = 1, C_{jk} = 1 | \tilde{Y}_{ijk} = 1) \\
&\quad + 2\text{pr}\left(Y_{ijk} = 1, R_{ik} = 1, \sum_{j'=1}^n C_{j'k} = 0 \mid \tilde{Y}_{ijk} = 1\right) \\
&= S_{e:k}^{(1)} (S_{e:k}^{(n)})^2 + 2S_{e:k}^{(1)} S_{e:k}^{(n)} \bar{S}_{e:k}^{(n)} [1 - f_k(n)]^{n-1},
\end{aligned}$$

where the  $f_k(\cdot)$  function is given in Definition 1 (see Appendix A).

The second probability  $\text{pr}(Y_{ijk} = 1, T_{ijk'}^{(\text{AT})} = 1 | \tilde{Y}_{ijk} = 1)$  equals

$$\begin{aligned} & \frac{S_{e:k}^{(1)}}{\pi_k} \left\{ \text{pr}(R_{ik'} = 1, C_{jk'} = 1, \tilde{Y}_{ijk} = 1) + 2\text{pr} \left( R_{ik'} = 1, \sum_{j'=1}^n C_{j'k'} = 0, \tilde{Y}_{ijk} = 1 \right) \right\} \\ &= \frac{S_{e:k}^{(1)}}{\pi_k} \left\{ \eta_k^{(1)} \{f_{k'}(n-1)\}^2 + p_{11}(S_{e:k'}^{(n)})^2 + 2p_{11}S_{e:k'}^{(n)}\bar{S}_{e:k'}^{(n)}\{1 - f_{k'}(n)\}^{n-1} \right. \\ & \quad \left. + \underbrace{\text{pr} \left( R_{ik'} = 1, \sum_{j'=1}^n C_{j'k'} = 0, \tilde{Y}_{ijk} = 1, \tilde{Y}_{ijk'} = 0 \right)}_{(*)} \right\}, \end{aligned}$$

where  $(*)$  can be written as

$$\begin{aligned} & \sum_{r_{k'}=0}^1 \sum_{c_{k'}=r_{k'}}^n \text{pr} \left( \tilde{R}_{ik'} = r_{k'}, \sum_{j'=1}^n \tilde{C}_{j'k'} = c_{k'}, \tilde{Y}_{ijk} = 1, \tilde{Y}_{ijk'} = 0 \right) \\ & \quad \times (S_{e:2}^{(n)})^{r_{k'}} (\bar{S}_{p:2}^{(n)})^{1-r_{k'}} (\bar{S}_{e:2}^{(n)})^{c_{k'}} (S_{p:2}^{(n)})^{n-c_{k'}}. \end{aligned}$$

Define

$$h_{r_{k'}}^{(4)}(n; k, c_{k'}) = \text{pr} \left( \tilde{R}_{ik'} = r_{k'}, \sum_{j'=1}^n \tilde{C}_{j'k'} = c_{k'}, \tilde{Y}_{ijk} = 1, \tilde{Y}_{ijk'} = 0 \right),$$

for  $r_{k'} \in \{0, 1\}$ ,  $c_{k'} \in \{r_{k'}, r_{k'} + 1, \dots, n\}$ , and  $k = 1, 2$ . Using the functions given in Definition 3 (see Appendix A), we have

$$\begin{aligned} h_0^{(4)}(n; k, c_{k'}) &= \eta_k^{(1)} \{ \eta_0^{(n-1)} + \eta_k^{(n-1)} \} g_{k'}(c_{k'}; n-1, n) \\ h_1^{(4)}(n; k, c_{k'}) &= \eta_k^{(1)} \{ \eta_0^{(n-1)} + \eta_k^{(n-1)} \} g_{k'}(c_{k'}; n, n-1) \\ & \quad + \eta_k^{(1)} \{ \eta_3^{(n-1)} + \eta_k^{(n-1)} \} g_{k'}(c_{k'} - 1; n, n-1) - h_0^{(4)}(n; k, c_{k'}). \end{aligned}$$

The third probability on the RHS of Equation (B.1) is the most difficult to derive. We write  $\text{pr}(Y_{ijk} = 1, T_{ijk}^{(\text{AT})} = 1, T_{ijk'}^{(\text{AT})} = 1 | \tilde{Y}_{ijk} = 1)$  as

$$\begin{aligned} & \text{pr}(Y_{ijk} = 1, R_{ik} = 1, C_{jk} = 1, T_{ijk'}^{(\text{AT})} = 1 | \tilde{Y}_{ijk} = 1) \\ & \quad + 2\text{pr} \left( Y_{ijk} = 1, \mathbf{R}_i = (1, 1)', C_{jk'} = 1, \sum_{j'=1}^n C_{j'k} = 0 \middle| \tilde{Y}_{ijk} = 1 \right) \\ & \quad + 2\text{pr} \left( Y_{ijk} = 1, \mathbf{R}_i = (1, 1)', \sum_{j'=1}^n C_{j'1} = 0, \sum_{j'=1}^n C_{j'2} = 0 \middle| \tilde{Y}_{ijk} = 1 \right) \\ & \quad + 2\text{pr} \left( Y_{ijk} = 1, R_{i1} = 1, \sum_{j'=1}^n C_{j'1} = 0, \sum_{i'=1}^n R_{i'2} = 0, C_{j2} = 1 \middle| \tilde{Y}_{ijk} = 1 \right). \quad (\text{B.2}) \end{aligned}$$

The first probability in (B.2) equals  $(S_{e:k}^{(n)})^2 \text{pr}(Y_{ijk} = 1, T_{ijk'}^{(\text{AT})} = 1 | \tilde{Y}_{ijk} = 1)$ , and  $\text{pr}(Y_{ijk} = 1, T_{ijk'}^{(\text{AT})} = 1 | \tilde{Y}_{ijk} = 1)$  was derived above; i.e., the second probability in Equation (B.1).

The second probability in (B.2) equals

$$\frac{S_{e:k}^{(1)} S_{e:k}^{(n)} \bar{S}_{e:k}^{(n)}}{\pi_k} \left[ p_{11} (S_{e:k'}^{(n)})^2 \{1 - f_k(n)\}^{n-1} + f_{k'}(n-1) \text{pr} \left( R_{ik'} = 1, \sum_{j' \neq j} C_{j'k} = 0, \tilde{Y}_{ijk} = 1, \tilde{Y}_{ijk'} = 0 \right) \right],$$

where the  $f_k(\cdot)$  function is given in Definition 1 (see Appendix A). We can write the probability  $\text{pr}(R_{ik'} = 1, \sum_{j' \neq j} C_{j'k} = 0, \tilde{Y}_{ijk} = 1, \tilde{Y}_{ijk'} = 0)$  above as

$$\sum_{r_{k'}=0}^1 \sum_{c_k=0}^{n-1} \text{pr} \left( \tilde{R}_{ik'} = r_{k'}, \sum_{j' \neq j} \tilde{C}_{j'k} = c_k, \tilde{Y}_{ijk} = 1, \tilde{Y}_{ijk'} = 0 \right) (S_{e:k'}^{(n)})^{r_{k'}} (\bar{S}_{p:k'}^{(n)})^{1-r_{k'}} (S_{p:k}^{(n)})^{n-c_k-1} (\bar{S}_{e:k}^{(n)})^{c_k}.$$

Define

$$h_{r_{k'}}^{(5)}(n; k, c_k) = \text{pr} \left( \tilde{R}_{ik'} = r_{k'}, \sum_{j' \neq j} \tilde{C}_{j'k} = c_k, \tilde{Y}_{ijk} = 1, \tilde{Y}_{ijk'} = 0 \right),$$

for  $r_{k'} \in \{0, 1\}$ ,  $c_k \in \{0, 1, \dots, n-1\}$ , and  $k = 1, 2$ . Using the functions given in Definition 3 (see Appendix A), we have

$$\begin{aligned} h_0^{(5)}(n; k, c_k) &= \eta_k^{(1)} \sum_{w=0}^{c_k} \binom{n-1}{w} (\eta_k^{(1)})^w p_{00}^{n-1-w} g_k(c_k - w; n-1, n-w-1) \\ h_1^{(5)}(n; k, c_k) &= \eta_k^{(1)} g_k(c_k; n, n-1) - h_0^{(5)}(n; k, c_k). \end{aligned}$$

The third probability in (B.2) equals

$$\frac{S_{e:k}^{(1)} S_{e:k}^{(n)} \bar{S}_{e:k}^{(n)}}{\pi_k} \sum_{c_k=0}^{n-1} \sum_{r_{k'}=0}^1 \sum_{c_{k'}=r_{k'}}^n \text{pr} \left( \sum_{j' \neq j} \tilde{C}_{j'k} = c_k, \tilde{R}_{ik'} = r_{k'}, \sum_{j'=1}^n \tilde{C}_{j'k'} = c_{k'}, \tilde{Y}_{ijk} = 1 \right) \times (\bar{S}_{e:k}^{(n)})^{c_k} (S_{p:k}^{(n)})^{n-c_k-1} (S_{e:k'}^{(n)})^{r_{k'}} (\bar{S}_{p:k'}^{(n)})^{1-r_{k'}} (\bar{S}_{e:k'}^{(n)})^{c_{k'}} (S_{p:k'}^{(n)})^{n-c_{k'}}.$$

Define

$$h_{r_{k'}}^{(6)}(n; k, c_k, c_{k'}) = \text{pr} \left( \sum_{j' \neq j} \tilde{C}_{j'k} = c_k, \tilde{R}_{ik'} = r_{k'}, \sum_{j'=1}^n \tilde{C}_{j'k'} = c_{k'}, \tilde{Y}_{ijk} = 1 \right),$$

for  $r_{k'} \in \{0, 1\}$ ,  $c_k \in \{0, 1, \dots, n-1\}$ , and  $c_{k'} \in \{r_{k'}, r_{k'} + 1, \dots, n\}$ .

- When  $k = 1$ , we have

$$\begin{aligned} h_0^{(6)}(n; 1, c_1, c_2) &= \eta_1^{(1)} \{ \bar{\pi}_2^{n-1} g_{c_1, c_2}(n-1; \eta_0^{(n)}, \eta_1^{(n)}, p_{00} \eta_2^{(n-1)}, \bar{\pi}_2 \eta_3^{(n-1)} + \eta_1^{(1)} \eta_2^{(n-1)}) \\ &\quad + (1 - \bar{\pi}_2^{n-1}) g_{c_1, c_2-1}(n-1; \eta_0^{(n)}, \eta_1^{(n)}, p_{00} \eta_2^{(n-1)}, \bar{\pi}_2 \eta_3^{(n-1)} + \eta_1^{(1)} \eta_2^{(n-1)}) \} \\ h_1^{(6)}(n; 1, c_1, c_2) &= \{ p_{11} + p_{10} (1 - \bar{\pi}_2^{n-1}) \} g_{c_1, c_2-1}(n-1; \eta_0^{(n)}, \eta_1^{(n)}, \eta_2^{(n)}, \eta_3^{(n)}) \\ &\quad + p_{10} \bar{\pi}_2^{n-1} g_{c_1, c_2}(n-1; \eta_0^{(n)}, \eta_1^{(n)}, \eta_2^{(n)}, \eta_3^{(n)}) - h_0^{(6)}(n; 1, c_1, c_2), \end{aligned}$$

where the  $g_{\cdot, \cdot}(\cdot; \cdot)$  function is given in Definition 4 (see Appendix A).

- When  $k = 2$ , we have

$$\begin{aligned}
h_0^{(6)}(n; 2, c_2, c_1) &= \eta_2^{(1)} \{ \bar{\pi}_1^{n-1} g_{c_1, c_2}(n-1; \eta_0^{(n)}, p_{00} \eta_1^{(n-1)}, \eta_2^{(n)}, \bar{\pi}_1 \eta_3^{(n-1)} + \eta_2^{(1)} \eta_1^{(n-1)}) \\
&\quad + (1 - \bar{\pi}_1^{n-1}) g_{c_1-1, c_2}(n-1; \eta_0^{(n)}, p_{00} \eta_1^{(n-1)}, \eta_2^{(n)}, \bar{\pi}_1 \eta_3^{(n-1)} + \eta_2^{(1)} \eta_1^{(n-1)}) \} \\
h_1^{(6)}(n; 2, c_2, c_1) &= \{ p_{11} + p_{01} (1 - \bar{\pi}_1^{n-1}) \} g_{c_1-1, c_2}(n-1; \eta_0^{(n)}, \eta_1^{(n)}, \eta_2^{(n)}, \eta_3^{(n)}) \\
&\quad + p_{01} \bar{\pi}_1^{n-1} g_{c_1, c_2}(n-1; \eta_0^{(n)}, \eta_1^{(n)}, \eta_2^{(n)}, \eta_3^{(n)}) - h_0^{(6)}(n; 2, c_2, c_1).
\end{aligned}$$

The fourth probability in (B.2) equals

$$\begin{aligned}
\frac{S_{e:k}^{(1)} S_{e:k}^{(n)} \bar{S}_{e:k}^{(n)}}{\pi_k} &\left\{ \text{pr} \left( \sum_{j' \neq j} C_{j'k} = 0, \sum_{i'=1}^n R_{i'k'} = 0, C_{jk'} = 1, \tilde{Y}_{ijk} = 1, \tilde{Y}_{ijk'} = 1 \right) \right. \\
&\quad \left. + \text{pr} \left( \sum_{j' \neq j} C_{j'k} = 0, \sum_{i'=1}^n R_{i'k'} = 0, C_{jk'} = 1, \tilde{Y}_{ijk} = 1, \tilde{Y}_{ijk'} = 0 \right) \right\}. \quad (\text{B.3})
\end{aligned}$$

We calculate each probability in (B.3) separately using the  $B(\cdot, \cdot; \cdot, \cdot)$  function in Definition 5 (see Appendix A). The first probability in (B.3) is

$$S_{e:k'}^{(n)} \bar{S}_{e:k'}^{(n)} p_{11} \sum_{c_1=0}^{n-1} \sum_{r_2=0}^{n-1} \underbrace{\text{pr} \left( \sum_{j' \neq j} \tilde{C}_{j'1} = c_1, \sum_{i' \neq i} \tilde{R}_{i'2} = r_2 \right)}_{(**)} (\bar{S}_{e:1}^{(n)})^{c_1} (S_{p:1}^{(n)})^{n-c_1-1} (\bar{S}_{e:2}^{(n)})^{r_2} (S_{p:2}^{(n)})^{n-r_2-1},$$

where  $(**)$  equals

$$\sum_{w_1=0}^{c_1} \sum_{w_2=0}^{r_2} \binom{n-1-w_1}{c_1-w_1} \binom{n-1-w_2}{r_2-w_2} \pi_1^{c_1-w_1} \bar{\pi}_1^{n-c_1-1} \pi_2^{r_2-w_2} \bar{\pi}_2^{n-r_2-1} B(n-1, w_1; n-1, w_2),$$

for  $c_1, r_2 \in \{0, 1, \dots, n-1\}$ . The second probability in (B.3) can be written as

$$\begin{aligned}
\sum_{c_k=0}^{n-1} \sum_{c_{k'}=0}^1 \sum_{r_{k'}=c_{k'}}^n &\text{pr} \left( \sum_{j' \neq j} \tilde{C}_{j'k} = c_k, \sum_{i'=1}^n \tilde{R}_{i'k'} = r_{k'}, \tilde{C}_{jk'} = c_{k'}, \tilde{Y}_{ijk} = 1, \tilde{Y}_{ijk'} = 0 \right) \\
&\times (\bar{S}_{e:k}^{(n)})^{c_1 k} (S_{p:k}^{(n)})^{n-c_k-1} (\bar{S}_{e:k'}^{(n)})^{r_{k'}} (S_{p:k'}^{(n)})^{n-r_{k'}} (S_{e:k'}^{(n)})^{c_{k'}} (\bar{S}_{p:k'}^{(n)})^{1-c_{k'}}.
\end{aligned}$$

Define

$$h_{c_{k'}}^{(7)}(n; k, c_k, r_{k'}) = \text{pr} \left( \sum_{j' \neq j} \tilde{C}_{j'k} = c_k, \sum_{i'=1}^n \tilde{R}_{i'k'} = r_{k'}, \tilde{C}_{jk'} = c_{k'}, \tilde{Y}_{ijk} = 1, \tilde{Y}_{ijk'} = 0 \right),$$

for  $c_{k'} \in \{0, 1\}$ ,  $c_k \in \{0, 1, \dots, n-1\}$ , and  $r_{k'} \in \{c_{k'}, c_{k'} + 1, \dots, n\}$ .

- When  $k = 1$ , we have

$$\begin{aligned}
h_0^{(7)}(n; 1, c_1, r_2) &= p_{10} \bar{\pi}_2^{n-1} B(n-1, c_1; n, r_2) \\
h_1^{(7)}(n; 1, c_1, r_2) &= p_{10} \sum_{w_1=0}^{c_1} \sum_{w_2=1}^{\min\{n-1, r_2\}} \binom{n-1}{w_2} \binom{n-w_1-1}{c_1-w_1} \pi_2^{w_2} \bar{\pi}_2^{n-w_2-1} \\
&\quad \times (1 - \bar{\pi}_1^{w_2})^{c_1-w_1} (\bar{\pi}_1^{w_2})^{n-1-c_1} B(n-1, w_1; n-w_2, r_2-w_2).
\end{aligned}$$



- When  $k = 2$ , we have

$$\begin{aligned}
h_0^{(7)}(n; 2, c_2, r_1) &= p_{01} \bar{\pi}_1^{n-1} B(n, r_1; n-1, c_2) \\
h_1^{(7)}(n; 2, c_2, r_1) &= p_{01} \sum_{w_1=0}^{c_2} \sum_{w_2=1}^{\min\{n-1, r_1\}} \binom{n-1}{w_1} \binom{n-w_2-1}{c_2-w_2} \pi_1^{w_1} \bar{\pi}_1^{n-w_1-1} \\
&\quad \times (1 - \bar{\pi}_1^{w_1})^{c_2-w_2} (\bar{\pi}_2^{w_1})^{n-c_2-1} B(n-w_1, r_1-w_1; n-1, w_2).
\end{aligned}$$

This completes the derivation of  $\text{PS}_{e:k}$  for  $K = 2$  diseases.

Deriving  $\text{PS}_{p:k}$  for  $K = 2$  diseases is easier because  $\text{PS}_{p:k}$  can be written as a function of  $\text{EFF}(\text{AT})$  and  $\text{PS}_{e:k}$ . Recall that  $\text{PS}_{p:k}$  is the probability an individual is classified as negative for the  $k$ th infection ( $k = 1, 2$ ) given that the individual is truly negative for the  $k$ th infection. Therefore,

$$1 - \text{PS}_{p:k} = \text{pr}(Y_{ijk} = 1, T_{ij1}^{(\text{AT})} + T_{ij2}^{(\text{AT})} \geq 1 | \tilde{Y}_{ijk} = 0) = \frac{\bar{S}_{p:k}^{(1)}}{\bar{\pi}_k} \left\{ \text{EFF}(\text{AT}) - \frac{\pi_k \text{PS}_{e:k}}{S_{e:k}^{(1)}} - \frac{2}{n} \right\}.$$

**Appendix C. Operating characteristics of ATM for  $K = 2$  diseases.** We derive closed-form expressions for  $\text{EFF}(\text{ATM})$  and accuracy probabilities  $\text{PS}_{e:k}$  and  $\text{PS}_{p:k}$  when ATM is used for  $K = 2$  diseases. The ATM algorithm was described in Section 3.3 in the manuscript. Let  $S_{e:k}^{(n^2)}$  and  $S_{p:k}^{(n^2)}$  denote the multiplex assay accuracy probabilities for testing the master array. The efficiency of ATM is

$$\text{EFF}(\text{ATM}) = \frac{1}{n^2} \left\{ 1 + 2n \text{pr}(M_1 + M_2 \geq 1) + n^2 \text{pr}(T_{ij1}^{(\text{ATM})} + T_{ij2}^{(\text{ATM})} \geq 1) \right\}. \quad (\text{C.1})$$

We derive closed-form expressions for each probability on the RHS of Equation (C.1). The following three definitions are needed.

**DEFINITION 6:** Let  $f^o(s)$  denote the probability a pool with size  $s \leq n^2$  is diagnosed positively for at least one disease. Then

$$f^o(s) = 1 - \eta_0^{(s)} S_{p:1}^{(n^2)} S_{p:2}^{(n^2)} - \eta_1^{(s)} \bar{S}_{e:1}^{(n^2)} S_{p:2}^{(n^2)} - \eta_2^{(s)} S_{p:1}^{(n^2)} \bar{S}_{e:2}^{(n^2)} - \eta_3^{(s)} \bar{S}_{e:1}^{(n^2)} \bar{S}_{e:2}^{(n^2)}.$$

**DEFINITION 7:** Let  $\widetilde{M}_k = 1$  if the master array is truly positive for the  $k$ th disease;  $\widetilde{M}_k = 0$  otherwise. For  $k = 1, 2$ , let

$$\begin{aligned}
\beta_k(n) &= \text{pr}(R_{ik'} = 1, C_{jk'} = 1, \widetilde{M}_k = 0) \\
&= \eta_{k'} S_{e:k'}^{(1)} S_{e:k'}^{(n)} \bar{\pi}_k^{n^2-1} + p_{00} \bar{\pi}_k^{n^2-2n+1} (\eta_0^{(n-1)} \bar{S}_{p:k'}^{(n)} + \eta_{k'}^{(n-1)} S_{e:k'}^{(n)})^2.
\end{aligned}$$

**DEFINITION 8:** For  $k = 1, 2$ , let

$$\begin{aligned}
\gamma_k(n) &= \text{pr} \left( R_{ik'} = 1, \sum_{j=1}^n C_{jk'} = 0, \widetilde{M}_k = 0 \right) \\
&= \sum_{r_{k'}=0}^1 \sum_{c'_k=r_{k'}}^n \text{pr} \left( \tilde{R}_{ik'} = r_{k'}, \sum_{j=1}^n \tilde{C}_{jk'} = c_{k'}, \widetilde{M}_k = 0 \right) (S_{e:k'}^{(n)})^{r_{k'}} (\bar{S}_{p:k'}^{(n)})^{1-r_{k'}} (\bar{S}_{e:k'}^{(n)})^{c_{k'}} (S_{p:k'}^{(n)})^{n-c_{k'}},
\end{aligned}$$

for  $r'_k \in \{0, 1\}$ . Furthermore, for  $c_{k'} = \{r_{k'}, r_{k'} + 1, \dots, n\}$ , define

$$\begin{aligned}\gamma_k^0(n; c_{k'}) &\equiv \text{pr} \left( \widetilde{R}_{ik'} = 0, \sum_{j=1}^n \widetilde{C}_{jk'} = c_{k'}, \widetilde{M}_k = 0 \right) = \eta_0^{(n)} \binom{n}{c_{k'}} (\eta_{k'}^{(n-1)})^{c_{k'}} (\eta_0^{(n-1)})^{n-c_{k'}} \\ \gamma_k^1(n; c_{k'}) &\equiv \text{pr} \left( \widetilde{R}_{ik'} = 1, \sum_{j=1}^n \widetilde{C}_{jk'} = c_{k'}, \widetilde{M}_k = 0 \right) = \binom{n}{c_{k'}} (\eta_{k'}^{(n)})^{c_{k'}} (\eta_0^{(n)})^{n-c_{k'}} - \gamma_k^0(n; c_{k'}).\end{aligned}$$

With these additional definitions, we now provide closed-form expressions for each probability on the RHS of Equation (C.1). The first probability  $\text{pr}(M_1 + M_2 \geq 1) = f^o(n^2)$ , where  $f^o(\cdot)$  is given in Definition 6. The second probability

$$\begin{aligned}\text{pr}(T_{ij1}^{(\text{ATM})} + T_{ij2}^{(\text{ATM})} \geq 1) &= \sum_{m_1=0}^1 \sum_{m_2=0}^1 \text{pr}(M_1 + M_2 \geq 1 | \widetilde{M}_1 = m_1, \widetilde{M}_2 = m_2) \\ &\quad \times \text{pr}(T_{ij1}^{(\text{AT})} + T_{ij2}^{(\text{AT})} \geq 1, \widetilde{M}_1 = m_1, \widetilde{M}_2 = m_2),\end{aligned}$$

for  $m_1, m_2 \in \{0, 1\}$ . It is easy to show  $\text{pr}(M_1 + M_2 \geq 1 | \widetilde{M}_1 = m_1, \widetilde{M}_2 = m_2) = 1 - (\overline{S}_{e:1}^{(n^2)})^{m_1} (S_{p:1}^{(n^2)})^{1-m_1} (\overline{S}_{e:2}^{(n^2)})^{m_2} (S_{p:2}^{(n^2)})^{1-m_2}$ . Define

$$h_{m_1 m_2}^{(8)}(n) = \text{pr}(T_{ij1}^{(\text{AT})} + T_{ij2}^{(\text{AT})} \geq 1, \widetilde{M}_1 = m_1, \widetilde{M}_2 = m_2),$$

for  $m_1, m_2 \in \{0, 1\}$ . Using the same conditioning arguments as in Appendix A, we have

$$\begin{aligned}h_{00}^{(8)}(n) &= \eta_0^{(n^2)} \{ (\overline{S}_{p:1}^{(n)})^2 + 2\overline{S}_{p:1}^{(n)}(S_{p:1}^{(n)})^n + (\overline{S}_{p:2}^{(n)})^2 + 2\overline{S}_{p:2}^{(n)}(S_{p:2}^{(n)})^n - (\overline{S}_{p:1}^{(n)})^2 (\overline{S}_{p:2}^{(n)})^2 \\ &\quad - 2(\overline{S}_{p:1}^{(n)})^2 \overline{S}_{p:2}^{(n)}(S_{p:2}^{(n)})^n - 2(\overline{S}_{p:2}^{(n)})^2 \overline{S}_{p:1}^{(n)}(S_{p:1}^{(n)})^n - 4\overline{S}_{p:1}^{(n)}(S_{p:1}^{(n)})^n \overline{S}_{p:2}^{(n)}(S_{p:2}^{(n)})^n \} \\ h_{10}^{(8)}(n) &= \beta_2(n) + 2\gamma_2(n) + \overline{\pi}_2^{n^2} \{ (\overline{S}_{p:2}^{(n)})^2 + 2\overline{S}_{p:2}^{(n)}(S_{p:2}^{(n)})^n \} - (\overline{S}_{p:2}^{(n)})^2 \beta_2(n) - 2\overline{S}_{p:2}^{(n)}(S_{p:2}^{(n)})^n \beta_2(n) \\ &\quad - 2(\overline{S}_{p:2}^{(n)})^2 \gamma_2(n) - 4\overline{S}_{p:2}^{(n)}(S_{p:2}^{(n)})^n \gamma_2(n) \\ h_{01}^{(8)}(n) &= \beta_1(n) + 2\gamma_1(n) + \overline{\pi}_1^{n^2} \{ (\overline{S}_{p:1}^{(n)})^2 + 2\overline{S}_{p:1}^{(n)}(S_{p:1}^{(n)})^n \} - (\overline{S}_{p:1}^{(n)})^2 \beta_1(n) - 2\overline{S}_{p:1}^{(n)}(S_{p:1}^{(n)})^n \beta_1(n) \\ &\quad - 2(\overline{S}_{p:1}^{(n)})^2 \gamma_1(n) - 4\overline{S}_{p:1}^{(n)}(S_{p:1}^{(n)})^n \gamma_1(n)\end{aligned}$$

and  $h_{11}^{(8)}(n) = \text{pr}(T_{ij1}^{(\text{AT})} + T_{ij2}^{(\text{AT})} \geq 1) - h_{00}^{(8)}(n) - h_{10}^{(8)}(n) - h_{01}^{(8)}(n)$ , where the functions  $\beta_k(\cdot)$  and  $\gamma_k(\cdot)$  are given in Definitions 7 and 8, respectively. The probability  $\text{pr}(T_{ij1}^{(\text{AT})} + T_{ij2}^{(\text{AT})} \geq 1)$  was derived in Appendix A. This completes the derivation of EFF(ATM).

The pooling sensitivity for ATM is

$$\begin{aligned}\text{PS}_{e:k} &= \text{pr}(Y_{ijk} = 1, T_{ij1}^{(\text{ATM})} + T_{ij2}^{(\text{ATM})} \geq 1 | \widetilde{Y}_{ijk} = 1) \\ &= \sum_{m_{k'}=0}^1 \text{pr}(M_1 + M_2 \geq 1 | \widetilde{M}_{k'} = m_{k'}, \widetilde{Y}_{ijk} = 1) \\ &\quad \times \text{pr}(Y_{ijk} = 1, T_{ij1}^{(\text{AT})} + T_{ij2}^{(\text{AT})} \geq 1, \widetilde{M}_{k'} = m_{k'} | \widetilde{Y}_{ijk} = 1). \quad (\text{C.2})\end{aligned}$$

The first probability on the RHS of Equation (C.3),  $\text{pr}(M_1 + M_2 \geq 1 | \widetilde{M}_{k'} = m_{k'}, \widetilde{Y}_{ijk} = 1) = 1 - \overline{S}_{e:k}^{(n^2)} (\overline{S}_{e:k'}^{(n^2)})^{m_{k'}} (S_{p:k'}^{(n^2)})^{1-m_{k'}}$ . Define

$$h_{m_{k'}}^{(9)}(n; k) = \text{pr}(Y_{ijk} = 1, T_{ij1}^{(\text{AT})} + T_{ij2}^{(\text{AT})} \geq 1, \widetilde{M}_{k'} = m_{k'} | \widetilde{Y}_{ijk} = 1),$$

for  $m_{k'} \in \{0, 1\}$ . When  $m_{k'} = 0$ ,

$$\begin{aligned} h_0^{(9)}(n; k) &= \text{pr}(Y_{ijk} = 1, T_{ijk}^{(\text{AT})} = 1, \widetilde{M}_{k'} = 0 | \widetilde{Y}_{ijk} = 1) \\ &\quad + \text{pr}(Y_{ijk} = 1, T_{ijk'}^{(\text{AT})} = 1, \widetilde{M}_{k'} = 0 | \widetilde{Y}_{ijk} = 1) \\ &\quad - \text{pr}(Y_{ijk} = 1, T_{ij1}^{(\text{AT})} = 1, T_{ij2}^{(\text{AT})} = 1, \widetilde{M}_{k'} = 0 | \widetilde{Y}_{ijk} = 1). \end{aligned} \quad (\text{C.3})$$

The first probability on the RHS of Equation (C.3) is

$$\pi_k^{-1} \{ \eta_k^{(1)} \overline{\pi}_{k'}^{n^2-1} S_{e:k}^{(1)} (S_{e:k}^{(n)})^2 + 2\eta_k^{(1)} \overline{\pi}_{k'}^{n-1} (\eta_k^{(n)} \overline{S}_{e:k}^{(n)} + \eta_0^{(n)} S_{p:k}^{(n)})^{n-1} S_{e:k}^{(1)} S_{e:k}^{(n)} \overline{S}_{e:k}^{(n)} \}.$$

The second probability on the RHS of Equation (C.3) is

$$\pi_k^{-1} \eta_k^{(1)} \overline{\pi}_{k'}^{n^2-1} \{ S_{e:k}^{(1)} (\overline{S}_{p:k'}^{(n)})^2 + 2S_{e:k}^{(1)} \overline{S}_{p:k'}^{(n)} (S_{p:k'}^{(n)})^n \}.$$

The third probability on the RHS of Equation (C.3) is

$$\begin{aligned} &\pi_k^{-1} [ \eta_k^{(1)} \overline{\pi}_{k'}^{n^2-1} S_{e:k}^{(1)} (S_{e:k}^{(n)})^2 \overline{S}_{p:k'}^{(n)} \{ \overline{S}_{p:k'}^{(n)} + 2(S_{p:k'}^{(n)})^n \} \\ &\quad + 2\eta_k^{(1)} \overline{\pi}_{k'}^{n-1} (\eta_k^{(n)} \overline{S}_{e:k}^{(n)} + \eta_0^{(n)} S_{p:k}^{(n)})^{n-1} S_{e:k}^{(1)} S_{e:k}^{(n)} \overline{S}_{e:k}^{(n)} \overline{S}_{p:k'}^{(n)} \{ \overline{S}_{p:k'}^{(n)} + 2(S_{p:k'}^{(n)})^n \} ]. \end{aligned}$$

When  $m_{k'} = 1$ ,  $h_1^{(9)}(n; k) = \text{PS}_{e:k}^{(\text{AT})} - h_0^{(9)}(n; k)$ , where  $\text{PS}_{e:k}^{(\text{AT})}$  was derived in Appendix B and  $h_0^{(9)}(n; k)$  is given above. This completes the derivation of  $\text{PS}_{e:k}$  for ATM.

The pooling specificity  $\text{PS}_{p:k}$  for ATM is given by

$$\text{PS}_{p:k} = 1 - \frac{\overline{S}_{p:k}^{(1)}}{\pi_k} \left\{ \text{EFF}(\text{ATM}) - \frac{\pi_k \text{PS}_{e:k}}{S_{e:k}^{(1)}} - \frac{2}{n} f^o(n^2) - \frac{1}{n^2} \right\},$$

where  $f^o(\cdot)$  is given in Definition 6 and  $\text{EFF}(\text{ATM})$  and  $\text{PS}_{e:k}$  are the efficiency and pooling sensitivity derived in this web appendix.

**Appendix D.** *Additional results from Section 4.* Here is an outline of the material in this web appendix:

**Page 12:** Figure D.1. Simulation study for Cases 5-8 in Table 1. This figure complements Figure 2 in the manuscript (and is constructed in the same way as described in Section 4).

**Page 13:** Table D.1. Classification accuracy probabilities for Cases 1-4 in Table 1 (equal marginal disease probabilities). These are exact calculations using the derivations in Appendices B and C.

**Page 14:** Table D.2. Classification accuracy probabilities for Cases 5-8 in Table 1 (unequal marginal disease probabilities). These are exact calculations using the derivations in Appendices B and C.

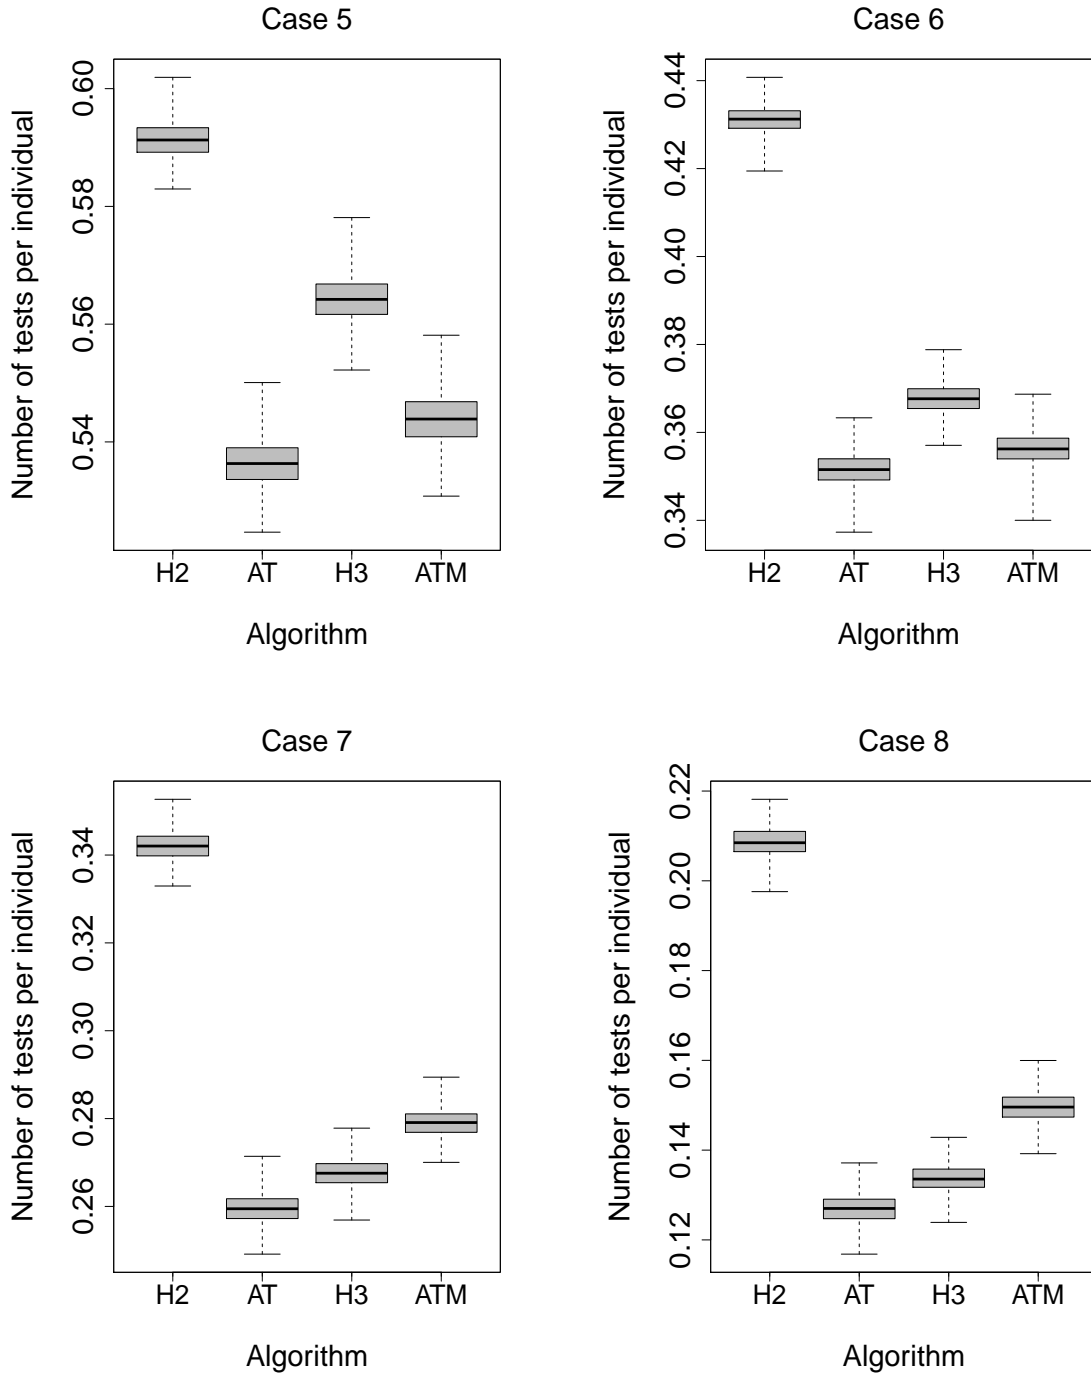

Figure D.1: Simulation study for Cases 5-8 in Table 1 in the manuscript. Boxplots of the number of tests per individual using  $B = 1000$  Monte Carlo data sets. Array and hierarchical group sizes are the same as those in Table 1 in the manuscript.

Table D.1: Classification accuracy probabilities for two- and three-stage algorithms with  $S_{e,k} = 0.95$  and  $S_{p,k} = 0.99$  for testing all pools (regardless of size) and individuals. Cases 1-4 in this table are identical to those in Table 1 in the manuscript. Because the marginal disease probabilities  $\pi_1 = p_{10} + p_{11}$  and  $\pi_2 = p_{01} + p_{11}$  are equal in each case, accuracy probabilities are the same for each disease.

|               | Algorithm        | PS <sub>e:1</sub> | PS <sub>e:2</sub> | PS <sub>p:1</sub> | PS <sub>p:2</sub> | PPV <sub>1</sub> | PPV <sub>2</sub> | NPV <sub>1</sub> | NPV <sub>2</sub> |
|---------------|------------------|-------------------|-------------------|-------------------|-------------------|------------------|------------------|------------------|------------------|
| <b>Case 1</b> | $p_{00} = 0.90$  | 0.923             | 0.923             | 0.997             | 0.997             | 0.951            | 0.951            | 0.995            | 0.995            |
|               | $p_{10} = 0.04$  | 0.895             | 0.895             | 0.998             | 0.998             | 0.960            | 0.960            | 0.993            | 0.993            |
|               | $p_{01} = 0.04$  | 0.902             | 0.902             | 0.998             | 0.998             | 0.964            | 0.964            | 0.994            | 0.994            |
|               | $p_{11} = 0.02$  | 0.892             | 0.892             | 0.998             | 0.998             | 0.960            | 0.960            | 0.993            | 0.993            |
| <b>Case 2</b> | $p_{00} = 0.95$  | 0.921             | 0.921             | 0.998             | 0.998             | 0.931            | 0.931            | 0.998            | 0.998            |
|               | $p_{10} = 0.02$  | 0.892             | 0.892             | 0.999             | 0.999             | 0.952            | 0.952            | 0.997            | 0.997            |
|               | $p_{01} = 0.02$  | 0.895             | 0.895             | 0.999             | 0.999             | 0.961            | 0.961            | 0.997            | 0.997            |
|               | $p_{11} = 0.01$  | 0.890             | 0.890             | 0.999             | 0.999             | 0.958            | 0.958            | 0.997            | 0.997            |
| <b>Case 3</b> | $p_{00} = 0.97$  | 0.928             | 0.928             | 0.998             | 0.998             | 0.910            | 0.910            | 0.999            | 0.999            |
|               | $p_{10} = 0.01$  | 0.903             | 0.903             | 0.999             | 0.999             | 0.949            | 0.949            | 0.998            | 0.998            |
|               | $p_{01} = 0.01$  | 0.909             | 0.909             | 0.999             | 0.999             | 0.951            | 0.951            | 0.998            | 0.998            |
|               | $p_{11} = 0.01$  | 0.904             | 0.904             | 0.999             | 0.999             | 0.966            | 0.966            | 0.998            | 0.998            |
| <b>Case 4</b> | $p_{00} = 0.99$  | 0.920             | 0.920             | 0.999             | 0.999             | 0.831            | 0.831            | 1.000            | 1.000            |
|               | $p_{10} = 0.004$ | 0.887             | 0.887             | 1.000             | 1.000             | 0.916            | 0.916            | 0.999            | 0.999            |
|               | $p_{01} = 0.004$ | 0.892             | 0.892             | 1.000             | 1.000             | 0.925            | 0.925            | 0.999            | 0.999            |
|               | $p_{11} = 0.004$ | 0.912             | 0.912             | 1.000             | 1.000             | 0.977            | 0.977            | 0.999            | 0.999            |

Table D.2: Classification accuracy probabilities for two- and three-stage algorithms with  $S_{e,k} = 0.95$  and  $S_{p,k} = 0.99$  for testing all pools (regardless of size) and individuals. Cases 5-8 in this table are identical to those in Table 1 in the manuscript. Because the marginal disease probabilities  $\pi_1 = p_{10} + p_{11}$  and  $\pi_2 = p_{01} + p_{11}$  are unequal in each case, accuracy probabilities for each disease may be unequal.

|               | Algorithm         | PS <sub>e:1</sub> | PS <sub>e:2</sub> | PS <sub>p:1</sub> | PS <sub>p:2</sub> | PPV <sub>1</sub> | PPV <sub>2</sub> | NPV <sub>1</sub> | NPV <sub>2</sub> |
|---------------|-------------------|-------------------|-------------------|-------------------|-------------------|------------------|------------------|------------------|------------------|
| <b>Case 5</b> | $p_{00} = 0.90$   | 0.908             | 0.920             | 0.997             | 0.997             | 0.967            | 0.851            | 0.992            | 0.998            |
|               | $p_{10} = 0.08$   | 0.865             | 0.908             | 0.998             | 0.997             | 0.972            | 0.872            | 0.988            | 0.998            |
|               | $p_{01} = 0.016$  | 0.870             | 0.899             | 0.998             | 0.998             | 0.976            | 0.884            | 0.988            | 0.998            |
|               | $p_{11} = 0.004$  | 0.852             | 0.905             | 0.998             | 0.997             | 0.972            | 0.872            | 0.987            | 0.998            |
| <b>Case 6</b> | $p_{00} = 0.95$   | 0.907             | 0.918             | 0.998             | 0.998             | 0.952            | 0.806            | 0.996            | 0.999            |
|               | $p_{10} = 0.04$   | 0.864             | 0.904             | 0.999             | 0.998             | 0.965            | 0.849            | 0.994            | 0.999            |
|               | $p_{01} = 0.008$  | 0.866             | 0.888             | 0.999             | 0.999             | 0.974            | 0.876            | 0.994            | 0.999            |
|               | $p_{11} = 0.002$  | 0.849             | 0.905             | 0.999             | 0.999             | 0.969            | 0.864            | 0.993            | 0.999            |
| <b>Case 7</b> | $p_{00} = 0.97$   | 0.906             | 0.917             | 0.998             | 0.998             | 0.931            | 0.702            | 0.997            | 1.000            |
|               | $p_{10} = 0.025$  | 0.862             | 0.902             | 0.999             | 0.999             | 0.956            | 0.788            | 0.996            | 1.000            |
|               | $p_{01} = 0.004$  | 0.865             | 0.889             | 0.999             | 0.999             | 0.963            | 0.809            | 0.996            | 0.999            |
|               | $p_{11} = 0.001$  | 0.845             | 0.915             | 0.999             | 0.999             | 0.973            | 0.851            | 0.996            | 1.000            |
| <b>Case 8</b> | $p_{00} = 0.99$   | 0.906             | 0.915             | 0.999             | 0.999             | 0.874            | 0.613            | 0.999            | 1.000            |
|               | $p_{10} = 0.008$  | 0.862             | 0.889             | 0.999             | 0.999             | 0.934            | 0.757            | 0.999            | 1.000            |
|               | $p_{01} = 0.0016$ | 0.865             | 0.883             | 1.000             | 1.000             | 0.947            | 0.792            | 0.999            | 1.000            |
|               | $p_{11} = 0.0004$ | 0.890             | 0.911             | 1.000             | 1.000             | 0.986            | 0.916            | 0.999            | 1.000            |

**Appendix E.** *Additional results from Section 5.* Here is an outline of the material in this web appendix:

**Page 16:** Figure E.1. Boxplots of the number of tests expended for four sex/specimen type stratum. These were constructed from the feasibility study described in Section 5 in the manuscript.

**Page 17:** Table E.1. Classification accuracy probabilities for H2, AT, and H3. These are exact calculations of  $PS_{e:k}$ ,  $PS_{p:k}$ ,  $PPV_k$ , and  $NPV_k$  using the information provided in Table 2 in the manuscript. Calculations for AT use the derivations in Appendix B. Calculations for H2 and H3 use the derivations in Tebbs et al. (2013) and Hou et al. (2017).

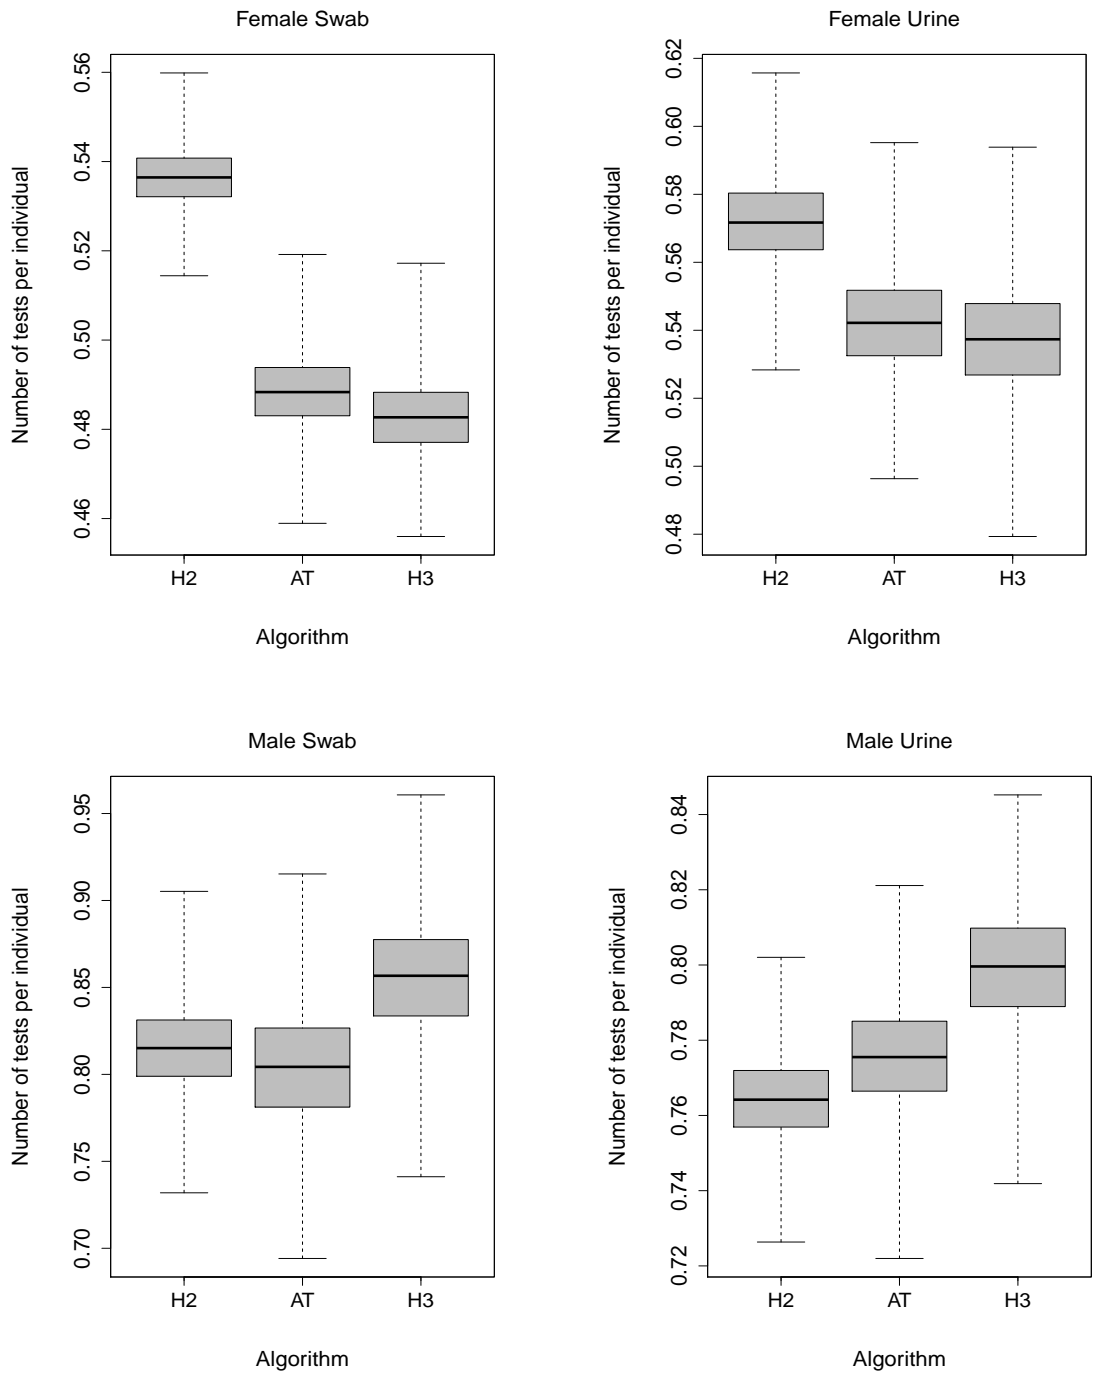

Figure E.1: Iowa SHL CT/NG feasibility study. Boxplots of the number of tests constructed from  $B = 5000$  data sets as described in Section 5. The number of individuals in each sex/specimen type stratum are provided in Table 3 in the manuscript. Array and hierarchical group sizes are also provided in this table.



Table E.1: Iowa SHL example. Theoretical values of efficiency (EFF) and classification accuracy  $PS_{e;k}$ ,  $PS_{p;k}$ ,  $PPV_k$ , and  $NPV_k$  ( $1 = CT$ ;  $2 = NG$ ) for each sex/specimen type stratum using the estimated probabilities  $\hat{p}_{00}$ ,  $\hat{p}_{10}$ ,  $\hat{p}_{01}$ , and  $\hat{p}_{11}$  and values of  $S_{e;k}$  and  $S_{p;k}$  in Table 2 in the manuscript. Calculations for AT use the derivations in Appendices A and B. Calculations for H2 and H3 use the derivations in Tebbs et al. (2013) and Hou et al. (2017).

| Stratum                        | Algorithm     | EFF   | $PS_{e;1}$ | $PS_{e;2}$ | $PS_{p;1}$ | $PS_{p;2}$ | $PPV_1$ | $PPV_2$ | $NPV_1$ | $NPV_2$ |
|--------------------------------|---------------|-------|------------|------------|------------|------------|---------|---------|---------|---------|
| Female Swab<br>( $N = 20332$ ) | H2(4 : 1)     | 0.536 | 0.891      | 0.989      | 0.994      | 0.996      | 0.927   | 0.619   | 0.991   | 1.000   |
|                                | AT(8 × 8)     | 0.487 | 0.844      | 0.989      | 0.996      | 0.997      | 0.938   | 0.664   | 0.988   | 1.000   |
|                                | H3(9 : 3 : 1) | 0.483 | 0.844      | 0.986      | 0.996      | 0.997      | 0.950   | 0.698   | 0.988   | 1.000   |
| Female Urine<br>( $N = 5998$ ) | H2(4 : 1)     | 0.571 | 0.900      | 0.877      | 0.997      | 0.998      | 0.969   | 0.736   | 0.990   | 0.999   |
|                                | AT(7 × 7)     | 0.541 | 0.856      | 0.890      | 0.998      | 0.998      | 0.976   | 0.782   | 0.986   | 0.999   |
|                                | H3(9 : 3 : 1) | 0.537 | 0.856      | 0.851      | 0.998      | 0.998      | 0.978   | 0.787   | 0.986   | 0.999   |
| Male Swab<br>( $N = 1298$ )    | H2(3 : 1)     | 0.815 | 0.928      | 0.987      | 0.990      | 0.990      | 0.947   | 0.839   | 0.987   | 0.999   |
|                                | AT(6 × 6)     | 0.803 | 0.895      | 0.984      | 0.990      | 0.990      | 0.946   | 0.842   | 0.981   | 0.999   |
|                                | H3(9 : 3 : 1) | 0.855 | 0.906      | 0.985      | 0.991      | 0.990      | 0.948   | 0.844   | 0.982   | 0.999   |
| Male Urine<br>( $N = 6183$ )   | H2(3 : 1)     | 0.764 | 0.960      | 0.979      | 0.995      | 0.998      | 0.973   | 0.926   | 0.993   | 1.000   |
|                                | AT(5 × 5)     | 0.776 | 0.942      | 0.980      | 0.996      | 0.999      | 0.978   | 0.936   | 0.989   | 1.000   |
|                                | H3(9 : 3 : 1) | 0.799 | 0.944      | 0.977      | 0.995      | 0.998      | 0.974   | 0.928   | 0.990   | 0.999   |
